# Supplementary material for: Respiratory syncytial virus disrupts the airway epithelial barrier by decreasing cortactin and destabilizing F-actin
Source: Oxford University Press journal article supplement (doi:10.1242/jcs.259871), 2022-07-18
Supplement: jcs259871supp.pdf [file jcs259871supp.pdf]

Fig. S1

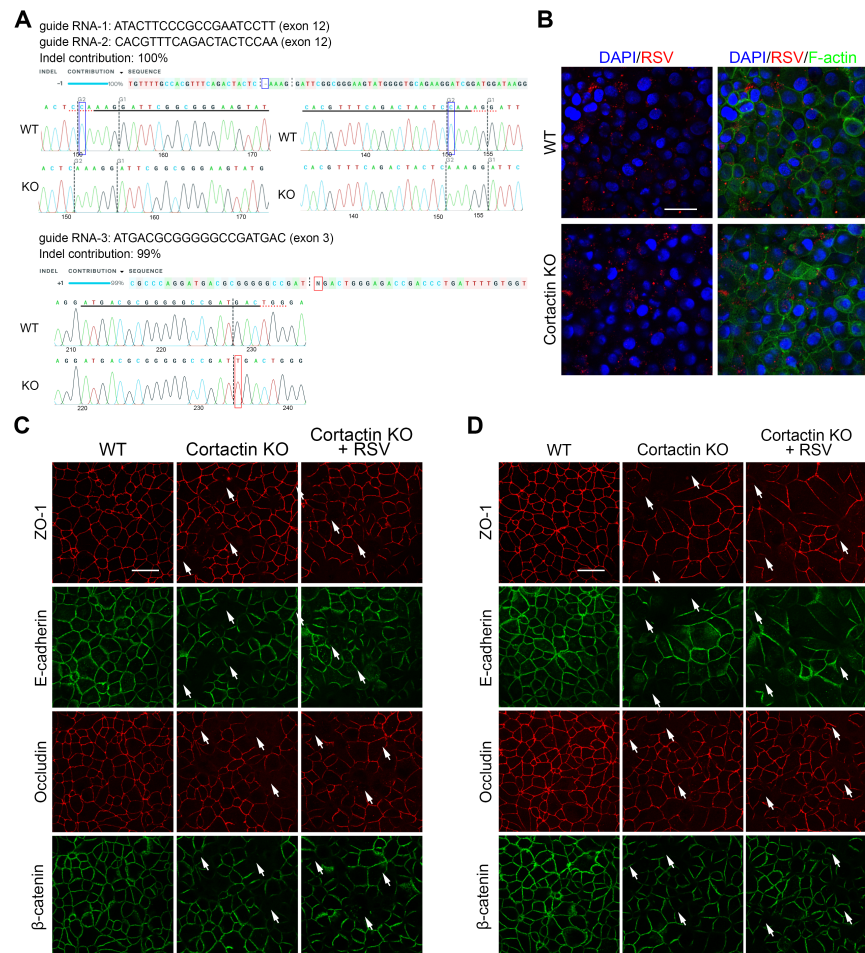

**Fig. S1. Related to Fig. 4. Disruptions in AJC staining are consistent across different clones of cortactin knockout 16HBE cells.** (A) Sanger sequencing data and Inference of CRISPR Edits (ICE, Synthego) analysis results of *CTTN* exon 3 and exon 12 genomic region from a representative cortactin KO clone. The horizontal black underlined regions represent the guide RNA sequences. The horizontal red underlines indicate the PAM sequences. The vertical black dotted lines indicate the Cas9 cutting sites. The insertion-deletion (indel) types and percentages of detected sequence (contribution) are shown. Blue rectangles represent -1 indel mutations and red rectangles indicate +1 indel mutations. (B) Representative images of RSV virus 24h after inoculation indicated comparable RSV infection in WT and cortactin KO cells. Scale bar, 25  $\mu$ m. (C) and (D) showed representative images from two independent clones that were different from the cells shown in Fig. 4. The structure of the apical junctional complex was determined by immunostaining with antibodies towards tight junction protein ZO-1 and occludin (red) as well as adherens junction protein E-cadherin and  $\beta$ -catenin (green). Arrows indicate disrupted AJCs in RSV-infected cells. Note that RSV infected-cortactin KO cells did not display further impairments in AJC structure compared with cortactin KO cells. Scale bar, 25  $\mu$ m.

Fig. S2

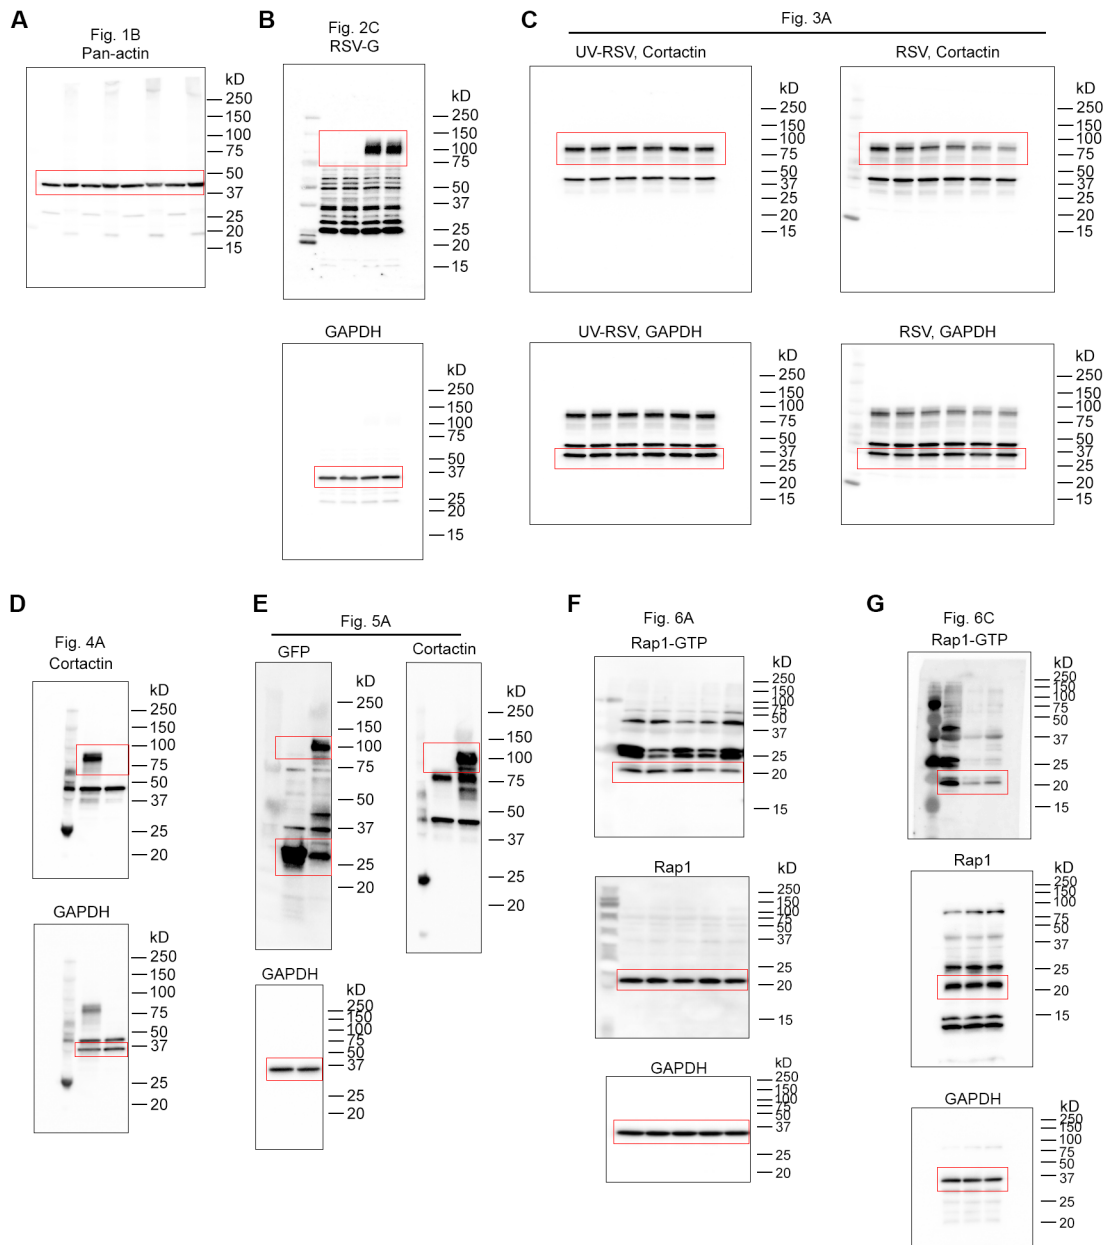

**Fig. S2. Blot transparency.** Full-length Western blots with indicated antibodies are shown for bands provided in Figures 1-6. Red rectangles are used to highlight where the bands were taken from.

**Table S1. Primary antibodies used for Western blot and immunostaining.**

| Antibodies         | Source                    | Catalog number | Clone number | Validation                                                     | Working dilution |
|--------------------|---------------------------|----------------|--------------|----------------------------------------------------------------|------------------|
| cortactin          | Millipore Sigma           | 05-180         | 4F11         | KO cell data included in this study (Fig. 4A)                  | 1:1000 (WB)      |
| cortactin          | Abcam                     | ab33333        | 4F11         | KO cell data included in this study (Fig. 4B)                  | 1:300 (IF)       |
| GAPDH              | Abcam                     | ab8245         | 6C5          | doi: 10.1038/s41467-018-08187-6                                | 1:50,000 (WB)    |
| pan-actin          | Sigma-Aldrich             | A2103          | Polyclonal   | doi: 10.3390/ijms21093152                                      | 1:1000 (WB)      |
| ZO-1               | Invitrogen                | 33-9100        | 1A12         | doi: 10.1074/jbc.M114.556449                                   | 1:300 (IF)       |
| ZO-1               | Invitrogen                | 40-2200        | polyclonal   | doi: 10.3389/fncel.2012.00026;<br>doi: 10.1074/jbc.M114.556449 | 1:300 (IF)       |
| E-cadherin         | Abcam                     | ab40772        | EP700Y       |                                                                | 1:300 (IF)       |
| E-cadherin         | BD Biosciences            | 610181         | 36           | doi: 10.1371/journal.pgen.1008451                              | 1:300 (IF)       |
| E-cadherin         | Cell Signaling Technology | 3195S          | 24E10        | doi: 10.1371/journal.pgen.1008451                              | 1:100 (IHC)      |
| occludin           | Invitrogen                | 33-1500        | OC-3F10      | doi: 10.1248/bpb.b15-01023                                     | 1:300 (IF)       |
| $\beta$ -catenin   | Abcam                     | ab32572        | E247         | doi: 10.1002/hep.30270                                         | 1:300 (IF)       |
| RSV G protein (A2) | GeneTex                   | GTX70381       | polyclonal   | doi: 10.1152/ajplung.00104.2020                                | 1:1000 (WB)      |
| GFP                | Abcam                     | ab290          | B-2          | doi: 10.1016/j.celrep.2019.02.012                              | 1:1000 (IF)      |
| Rap1               | Millipore Sigma           | 07-916         | polyclonal   | doi: 10.1016/j.celrep.2020.02.088                              | 1:1000 (WB)      |

WB: Western blot

IF: immunofluorescence staining

IHC: immunohistochemistry staining

**Table S2. Related to Fig. 4. PCR primers used to amplify targeted genomic DNA regions.**

Human *CTTN* exon3:

Forward: 5'-GTGTTAGAACCCCGAGGTGA-3'

Reverse: 5'-ACCCATCTTTGCTCCTTCT-3'

Human *CTTN* exon 12:

Forward: 5'-CATGGGTGGAAGCAAACCTT-3'

Reverse: 5'-GCACAAGACTGTCCGAGTCA-3'
